# Supplementary material for: Mapping Individual Earthquake Preparedness in China
Source: Copernicus journal article supplement (doi:10.5194/nhess-2017-391), 2017-11-09
Supplement: Supplementary file [file nhess-2017-391-AC4-supplement.pdf]

# Mapping Individual Earthquake Preparedness in China

Guochun Wu<sup>1</sup>, Ziqiang Han<sup>2,3</sup>, Weijin Xu<sup>1</sup>, Yue Gong<sup>4</sup>

<sup>1</sup>Institute of Geophysics, China Earthquake Administration, Beijing, 100081, China

<sup>2</sup>Institute for Disaster Management and Reconstruction, Sichuan University, Chengdu, 610207, China

5 <sup>3</sup>Center for Crisis Management Research, Tsinghua University, Beijing 100084, China

<sup>4</sup>China Earthquake Disaster Prevention Center, Beijing, 100000, China

*Correspondence to:* Ziqiang Han (hanziqiang@scu.edu.cn)

**Abstract.** Disaster preparedness is critical for reducing potential impact. This paper contributes to current knowledge of disaster preparedness using a representative national sample data from China, which faces high earthquake risks in many areas of the country. The adoption of earthquake preparedness activities by the general public, including five material preparation, and five awareness preparation were surveyed, and 3,245 respondents from all of the 31 provinces of mainland China participated in the survey. Linear regression models and Logit regression models were used to analyze the effects of potential influencing factors. Overall, the preparedness levels are not satisfied, with a material preparation score of 3.02 (1-5), and awareness preparation score of 2.79 (1-5), nationally. Meanwhile, residents from west China where have higher earthquake risk have higher preparedness degrees. The concern of disaster risk reduction, the concern of building safety and participation in public affairs are consistent positive predictors of both material and awareness preparedness. The demographic and socioeconomic variables' effects, such as gender, age, education, income, urban/rural division, and occupied building type, vary according to different preparedness activities. Finally, the paper concludes with a discussion of the theoretical contribution and potential implementation.

20

**Keywords:** earthquake; preparedness; China

## 1 Introduction

China is a country with high seismic risk. Within the last 100 years, one earthquake higher than Richer 7.5 degree ( $M \geq 7.5$  in short) would occur every five years in China on average, and a  $M \geq 8.0$  earthquake happened about every ten years. Though China only shares about 7% of the land area in the world, it has more than 35% of  $M \geq 7$  continental earthquakes. 58% of the whole land area, more than 50% of the cities and more than 70% of the urban population in China are residing in an area with high seismic risk---in the seismic zone with VII intensity degree or above (Gao et al., 2015).

Moreover, most parts of China are facing the threat of earthquakes. Though most of the recent earthquakes occurred in the western region, the east area with high population intensity is not free of danger. Based on the data from China Earthquake Network Centre (CENC), there were 130 earthquakes between M 6-7, 16 quakes between M 7-8 degree and two

30

earthquakes higher than M 8 degree occurred in Mainland China since 1980, and most of the  $M \geq 6.0$  earthquake occurred in western China and rarely occurred in the eastern area. Yunnan, Qinghai, Sichuan, Gansu, Xizang, and Xinjiang are prone-earthquake provinces. But when we look back for a longer period, the east part of China also had many earthquakes in the history. From 1500 to 1980, there were 94 M7-8 earthquakes and 15 earthquakes above M 8 degree in the mainland of China.

5 Tancheng Earthquake (1698), Pinggu-Sanhe Earthquake (1679) and Tangshan Earthquake (1976) all occurred in the north and eastern China, where has a large population (Figure 1). Thus, it can be concluded that seismic risk is a threat to most areas of China, and national studies covering all of China are needed.

[Figure 1 Here]

10

Pre-disaster mitigation and preparedness are critical methods to reduce potential disaster impact and to increase the resilience of community (Cui et al., 2018). A prior study from the United States indicates that one dollar investment in pre-disaster mitigation and preparedness would reduce four dollars potential losses (Godschalk et al., 2009). Thus, preparedness becomes a research and practice priority in recent years. For example, a National Preparedness Strategy has been proposed in

15 the United States, and prevention, protection, mitigation, response, and recovery are organized as the five mission areas of core capabilities of the National Preparedness Goal (FEMA, 2015). Preparedness is clearly stated as the "shared responsibility of all individuals, families, communities, private and nonprofit sectors, faith-based organizations, and levels of governments" (FEMA, 2016). Similarly, laws and regulations in the People's Republic of China, such as the Earthquake Mitigation and Reduction Act, and the 2016-2020 National Comprehensive Disaster Risk Reduction Plan request more efforts on mitigation

20 and preparedness. And the local government should take the responsibility of disaster preparedness education to increase the public's awareness and to improve the whole society's disaster response capacity (Anon, 2008; State Council of China, 2016). Therefore, studying individual preparedness for disasters can provide valuable knowledge to disaster and emergency management practices, and ultimately reduce the disaster losses.

Disaster preparedness studies have adopted various theoretical models from multiple research areas, with a

25 concentration in social psychology domain. The Protective Action Decision Model, Health Belief Model, Extended Parallel Process Model, Theory of Planned Behavior and Social Cognitive Theories, Personal-Relative-To-Event Model are the commonly adopted research frameworks (Duval and Mulilis, 1999; Ejeta et al., 2015; Lindell and Perry, 2012). Overall, all these models follow the psychological-behavior pattern, but with different components, pathways, structures or even terminologies. Jargons like protective behaviors/actions, hazards adjustment behaviors/actions, mitigation or preparedness are

30 the common phrases used to describe the activities undertaken in anticipation of natural hazards (Bubeck et al., 2012; Kohn et al., 2012; Lindell, 2013; Lindell and Perry, 2000; Wachinger et al., 2013). In this paper, the term "preparedness" is mainly used to describe these actions undertaken to keep consistency.

The attributes of natural hazards, the features of protective actions, and the perceived characteristics of related stakeholders are the three groups of interrelated determinants of household preparedness (Lindell, 2013). The features of

protective/adjustment behaviors refer to the efficacy, safety, time requirement, perceived implementation barriers and cost of undertaking that kind of preparedness action. For example, if action needs unique skills or very costly, people would not adopt it. The stakeholder characteristics include the trust in varied stakeholders, feeling of responsibility, etc. If one individual believes that the government agencies should take the primary responsibility for disaster relief, that may reduce their motivation to adopt protective actions. The attributes of natural hazards cover the proximity to natural hazards, and perceived risks, etc. Demographic and socioeconomic variables are always included as controlled variables in most of the studies. Recent literature reviews indicate that the relationship between risk perception and household preparedness is hardly observed in empirical studies. The factors of coping appraisal, termed as the efficacy of preparedness actions by Lindell (Lindell, 2013) are consistently related to preparedness behaviors (Bubeck et al., 2012; Kohn et al., 2012). Some demographic (such as gender, income, education) or household characteristics (number of dependents in a household), and previous disaster experience could also be predictors of household preparedness (Kohn et al., 2012). Overall the influencing factors of individual and household preparedness attitudes and behaviors are complex and multifaceted, and there is a need for further investigation.

For earthquake preparedness, in particular, demographic and socioeconomic variables are found to be predictors of adopting preparedness actions, though they are not consistent (Lindell et al., 2009). An exploratory study from Istanbul explored the association between earthquake preparedness and demographic variables like age, education, financial income, gender, etc., only using cross-tabulated tables, and the results showed that earthquake preparedness in this region had minor variations (Eraybar et al., 2010). Lessons learned from Turkey exhibited the correlations between the place of living, earthquake experience, risks, and socioeconomic variables and preparedness actions (Oral et al., 2015; Ozdemir and Yilmaz, 2011). The education level, living in a higher earthquake-prone area, participated in rescue and solidarity actions previously, knowledge, home ownership were significant predictors of preparedness in Istanbul (Tekeli-Yesil et al., 2010). Prior disaster experience and risk perception were found to be positive predictors of disaster preparedness in California (Han and Nigg, 2011), though another survey on homeowners displayed that when the appraised threat increase, only those who had sufficient resources had significant higher earthquake preparedness (Duval and Mulilis, 1999). Lessons from Dhaka city of Bangladesh revealed that residential unit value and the individual's education level were positively influencing factors of the respondent's earthquake preparedness (Paul and Bhuiyan, 2010). Similar observation from Israel declared gender differences in earthquake risk perception and knowledge (Soffer et al., 2011). A qualitative study from New Zealand through the symbolic interactionism perspective demonstrated that how individual make meaning of earthquake information that they exposed to is related to their undertaking actual preparedness actions (Becker et al., 2012). Psychological factors like tendency to take risks and their locus of control, home ownership, and length of residence were significant predictors of earthquake preparation (Spittal et al., 2008). For earthquake proximity, Lindell and Prater's finding in the United States demonstrated that the ones living with high seismic hazard and another area of moderate seismic hazard did not show significant differences. Instead, the perception of hazards-adjustment characteristics was correlated significantly with adoption intention and actual preparedness (Lindell and Prater, 2002).

The association between risk perception and preparedness behaviors vary across cultures and societies (Viklund, 2003). Within the Chinese cultural context, a prior analysis revealed that people having disaster experience (heavy-snow and earthquake in 2008) were not always more risk averse (Li et al., 2011). By comparing survey results from two cities with different smog exposures, Wei et al. found that proximity to threat (smog) had little impact on individual's risk perception and protective behavior, though the participants from the two cities differ considerably in their smog experience (Wei et al., 2017). One survey of the survivors of the 2010 Yushu earthquake in China showed that individuals with a higher degree of trust in government would have lower self-reported preparedness degrees (Han et al., 2017). Studies from Taiwan indicated that prior earthquake experience affected the perceived personal impact dimension of risk perception, but not the perceived controllability (sense of efficacy of self-protection) (Kung and Chen, 2012). And households with disabled members did not have significant preparedness variations regarding natural hazards (Han et al., 2017b). Methods of risk communication may matter in encouraging individual's adaptation of preparedness actions. Psychology experiment result demonstrated participants with higher ambiguity tolerance felt riskier and were more likely to purchase earthquake insurance when risk message came from official sources rather than peers (Zhu et al., 2012). Unlike prior studies using a small sample from specific geographical areas in China (Han et al., 2017a; Wei et al., 2017), this paper used a representative national sample, and thus it could more precise in contributing to current studies both theoretically and practically.

By analyzing this national representative sample, we characterized the individual's earthquake preparedness in China. In detail, the central questions of concern are: (1) will residents in the west of China (proximity to earthquake) have higher degrees of preparedness in general? (2) Would people with higher risk perceptions to an earthquake (e.g., the concern of disaster risk reduction and the concern of building safety) have a higher degree to preparedness; and (3) is participation in public affairs associated with higher degrees of earthquake preparedness? Besides the national representativeness of the data, we novelly explored the correlation between public involvement and the adoptions of disaster preparedness activities in China.

## 2 Methods

### 2.1 Sampling

An online survey of earthquake reduction communication was conducted from September 21st to October 10th in 2015 by a professional marketing survey company, with the sampling requirement guidelines from the authors. Gender, age, and education status were controlled in the sampling process according to the 6th national population census data (NPCD). 100 samples in each province of the mainland China were planned to be surveyed with a 5% of the variance. After the survey, we made a random check of the respondents' URL to make sure that every respondent was unique. A total of 3245 participants from all 31 provinces in mainland China and about 105 respondents from each province participated in the survey (Figure 2). Our sample was consistent with the 6th NPCD regarding gender, age, with a little difference of education degrees (Table 1). In our survey, 35% of the respondents had college and superior education, but in the 6th NPCD, 20% of the population had attended college.

[Table 1 Here]

[Figure 2 Here]

## 2.2 Measurements

Preparedness activities: Ten preparedness activities were proposed in our survey, five were related with material stockpile within a household, and the other five were related to capacity building and participation. The question "In order to prepare for potential earthquakes, do you have the following materials stockpiled in your home?" was used in the survey. Water, food, medicine, flashlight, and radio were proposed. If the respondent chose "yes" to that kind of material preparedness, the variable was coded as one. Otherwise, it was coded as zero. Meanwhile, the aggregation of the five material stockpile was used as a material stockpile preparedness score, and thus, it became a continuous variable ranging from zero to five, indicating the increasing degree of the material stockpile.

Besides, we also inquired the respondent's other five preparedness related behaviors, termed as knowing emergency shelter nearby, having participated in emergency exercise/drills, the intention of purchasing earthquake insurance if available, knowing the difference between earthquake predicting and earthquake warning, having visited the China Earthquake Administration Bureau's website or social media public communication page. If the respondent had positive feedback on one kind of the five activities, that variable was coded as one ("yes"). Otherwise, it was coded as zero ("no"). At last, the sum of the ten preparedness variables (five preparedness behaviors and five material stockpile) was generated as an overall degree of preparedness, ranging from zero to ten.

Influencing Factors: The respondents' occupied building characteristics, socioeconomic and demographic attributes, and psychological variables were used to explore their effects on the preparedness. Meanwhile, the geographical variation at the provincial level was controlled in all the models but not reported in the tables. The building type captured the height of the buildings they occupied. It was categorized as one-story, two or three-story, four to six-story, or higher than seven-story. The age of the building they occupied was another variable used to measure the characteristics of the occupied buildings, and it was a continuous variable measured by years. Gender, age, education attainment were the demographic variables included. Gender was a dummy variable, with one as male. Age was a continuous variable measured by years. Education was an ordinal variable ranking from one to five, representing the meaning of "Illiteracy or primary school," "Middle school", "High school", "College" and "Graduate or above." The annual income was measured by an ordinal variable ranking from one to three, meaning "less or equal to 60,000 RMB", "higher than 60,000 but less than 120,000 RMB" or "higher than 120,000 RMB". The rural-urban division was a dummy variable with one as an urban resident. We also included one measure of the respondent's participation in public affairs. It was obtained by the question "have you ever participated in your community vote?" and the answers were yes (1) or no (0). Two questions were adopted to capture the respondent's risk perception. One was "do you pay attention to the disaster risk reduction knowledge or issues during normal days?" and the answers were "Not at all (1)", "Not a lot (2)", "Neutral (3)", "Pay some attention (4)", "Pay lots of attention (5)". The other asked "Are you concern about your house safety?", and the answers were yes (1), and no (0).

## 2.3 Data Analysis

The ten preparedness activities were categorized as materials preparedness (water, food, medicine, flashlight, radio) and awareness preparedness (knowing shelter, participating drill, the intention of purchasing insurance, knowing the difference between predict and warning, seeking information from the CEA's website or social media page). We first mapped the geographical distribution of the material preparedness and awareness preparedness scores using GIS. Then, the general regression models were adopted to explore the effects of the variables on material preparedness, and awareness preparedness, respectively. Lastly, we examined the correlations of these influencing variables on each kind of the preparedness activities by logistic regression models. The statistical analysis was implemented by the statistical software Stata 13.1 MP version.

## 10 3 Results

The 3,245 respondents of our survey had an average age of 38.73. 46% of them were male, 61% were urban residents, 39% had participated in community vote before, 1.23% of them had primary school education attainment, 16.80% were middle school educated, 46.72% were high school educated, and 31.09% of them had attended college, and another 4.16% had graduate school education. 67.43% of them had an annual income less or equal than 60,000 RMB, 22.56% of them had an annual income between 60,000 to 120,000 RMB, and 10.01% earned more than 120,000 RMB each year. 11.98% of the respondents were living in the one-story building, 22.53% of them were living in two or three-story building, 39.14% were in four to six-story building, and 26.35% were in higher than seven-story buildings. 83% of the respondents concerned the safety of the buildings they occupied, about 68.51% of them indicated that they had paid attention to learning disaster risk reduction knowledge or skills.

20 In term of preparedness, 74% of the respondents had extra water stored at home, 72% of them had extra food, 65% had medicine in preparation, 69% had a flashlight at home, and 21% of them had radio prepared. 78% of them were aware that where was the nearest emergency shelter, 62% had participated in some kinds of emergency exercises or drills. If earthquake insurance were available, 41% of them would purchase. 45% of the respondents had visited the China Earthquake Administration bureau's website or social media (Weibo or Wechat) page for information. The aggregation of the five material-  
25 related preparedness activities was named as material preparedness in this paper, and it ranged from zero to five, with an average value of 3.02, with a standard deviation of 1.57. The awareness preparedness (sum of the five awareness related actions) had a mean value of 2.79, with a standard deviation of 1.54 (Table 2).

[Table 2 Here]

### 3.1 Mapping the Preparedness Activities

The mean values of material preparedness (5 items) and awareness preparedness (5 items) by province were mapped in Figure 3 and Figure 4. The average score of material preparedness was 3.02, while the awareness preparedness score was 2.79, both with a range from one to five. Overall, respondents in the western China, where had higher earthquake risks, had higher preparedness score. Regarding material preparation, the top five provinces were Yunnan (3.45), Qinghai (3.4), Fujian (3.38), Guizhou (3.36), and Sichuan (3.28), while the least three prepared provinces were Hunan (2.6), Hubei (2.7) and Henan (2.71). For awareness preparedness, the top five prepared provinces were Yunnan (3.31), Sichuan (3.27), Xizang (3.27), Gansu (3.26) and Guizhou (3.26), while Shanghai (2.15), Beijing (2.17), Jiangsu(2.29), Hebei(2.39) and Hubei(2.43) were the five least prepared. Compared to the historical earthquake records in China (Fig. 1), people in the west of China, where have more earthquake records had a higher degree of preparedness.

[Figure 3 Here]

[Figure 4 Here]

### 3.2 Influencing Factors of Preparedness Behaviours

We first regressed on the awareness preparedness score and material preparedness score using general linear regression models. The adjusted R2 for the awareness preparedness model was 0.332 while the adjusted R2 for the material preparedness was 0.110. Overall, the psychological factors and participation variables were positive predictors of preparedness. With a higher degree of concern for building safety and concern for disaster risk reduction, the respondents would have a higher degree of both awareness preparedness and material preparedness. The ones who had participated in community voting would also have both higher degrees of awareness and material preparedness compared with the ones who did not participate in the voting. Being male was also positively associated with both awareness and material preparedness. The elders would have a lower degree of awareness preparedness, but such difference on material preparedness was not significant. Annual income was also positively correlated with awareness preparedness, but not material preparedness. It's out of our expectation that urban residents had lower awareness preparedness and material preparedness degrees, though such effect on awareness preparedness was not statistically significant. The type of buildings (height) did not affect the awareness preparedness, but people living in higher story buildings would prepare more materials. The building age's effect was not significant in predicting the material preparedness but was negatively associated with awareness preparedness (Table 3).

[Table 3 Here]

[Table 4 Here]

[Table 5 Here]

The impact of the proposed predictors on each kind of material preparedness and awareness preparedness were estimated using logistic regression models, and the results (odds ratios) were reported in Table 4 and Table 5. Overall, the concern of building safety and concern of disaster risk reduction were the two most consistent and strongest positive predictors of almost all the ten preparedness behaviors, besides the insignificant effect of the concern of building safety on knowing nearby shelters. The participation variable (voting) were strong predictors of all the five awareness preparedness actions, but its effects on most of the material preparedness, such as water, food, flashlight, and radio were not statistically significant. Being a male was significantly more possible to obtain a radio, know the nearby shelter, and tell the difference between earthquake warning and predicting. The elders didn't demonstrate significant differences in all the five material preparing, but they would have a slightly lower probability of participating a drill, purchasing insurances, telling the difference between predict and warning, and seeking earthquake-related information. The education was significantly and positively associated with participating a drill and preparing water and food at home. The annual income was only significantly correlated with higher probability of preparing medicine at home, purchasing insurance, and seeking earthquake-related information. The urban residents had a significantly lower probability of preparing food, water, and medicine at home compared with rural residents, and they would also have a lower probability of participating emergency drills. The building type and age of the occupied buildings' effects were not significant for most of the preparedness activities.

#### **4 Discussion**

In this paper, we analyzed the individual's preparedness activities for the earthquake in China using a national sample. We found that the public in western China, where has higher seismic risks, do have a higher degree of preparedness, for both material preparedness and awareness preparedness. Most of the least prepared are in the eastern provinces. This indicates that most of the public is aware of the earthquake risk in their region. The result also demonstrated that hazards proximity is positively correlated with hazards (earthquake) preparedness (Bonaiuto et al., 2016; Howe, 2011; Lindell, 2013; Mishra et al., 2010; Russell et al., 1995; Zhang et al., 2010).

We differentiated the preparedness activities into material preparedness and awareness preparedness. Overall, our data showed that the concern of disaster risk reduction and the concern of building safety are positively associated with both material preparedness and awareness preparedness. Moreover, the correlations between the concern of disaster risk reduction and all the five physical preparedness activities and the five awareness activities are positive. The concern with building safety's positive effect is not significant for the "knowing shelter" only. The concern of disaster risk reduction and concern of building safety can be seen as risk perception. Similar to most of the prior studies, risk perception is a positive predictor of individual disaster preparedness (Bronfman et al., 2016; Han et al., 2017; Han and Nigg, 2011; Sadiq and Graham, 2016; Zhang et al., 2010).

The participation of public affairs (vote) is significantly and positively associated with the overall awareness preparedness score and separated awareness preparedness activities, but most of such correlations with individual material



preparedness are not significant, though the association with the overall material preparedness score is significant. In this paper, we innovatively explored the role of public participation in individual disaster preparedness. Prior studies have demonstrated that trust in relevant stakeholders, such as trust in government could discourage individual's preparedness (Han et al., 2017; Terpstra, 2011), though some studies provide reverse or non-significant evidence (Basolo et al., 2009; DeYoung et al., 2016). Moreover, the feeling of responsibility---when an individual feels more responsible for personal safety, they would prepare more for potential hazards (Arceneaux and Stein, 2006; Mulilis and Duval, 1997; Wei et al., 2017). Our results demonstrated that individual's participation in general public affairs could be a good predictor of individual's disaster preparedness because disaster is more like a public issue that would impact both individuals and the public, and also a shared responsibility between individuals and society.

10 In sum, we significantly contribute to current disaster preparedness studies by using a national data from China, exploring the role of public participation, and concern of building safety, as well as the concern of disaster risk reduction. **The findings of this paper also provide valuable implications for disaster risk reduction practice: people with higher degrees of participation in public affairs would also like to invest more in disaster preparedness. The involvement in disaster risk reduction activities cannot be separated from the involvement in other public issues.** But this paper does have at least three limitations. 15 First, we only explored the variations of preparedness at province level, which is quite large and blur. Future studies with more specific geographical locations which can measure the proximity to hazards are needed. Second, we did not include the efficacy (Roush and Tyson, 2012; Samaddar et al., 2014) of the preparedness activities in our analysis, and the covering of these factors do need in future. **Third, the preparedness at organizational and community level should be investigated as well.**

## 5 Conclusions

20 This paper maps the earthquake preparedness in mainland China using a representative national sample, by the first time as we know. Ten earthquake preparedness activities are proposed, five of them are material preparation, and five of them are awareness preparation. Overall the preparedness degrees are not satisfied, with a national material preparedness score of 3.02 (1-5), and a national awareness preparedness score of 2.79 (1-5). Regarding geographical distribution, the western China where has experienced earthquakes recently has relatively higher degrees of preparation, for both material and awareness 25 preparedness. The concern of disaster risk reduction, the concern of building safety, and participation in public affairs (vote) are consistent positive predictors of both material preparedness and awareness preparedness. The role of gender, age, education, income, urban/rural divisions, and occupied building characteristics vary according to different preparedness activities.

## References

Arceneaux, K. and Stein, R. M.: Who is Held Responsible When Disaster Strikes? The Attribution of Responsibility for a 30 Natural Disaster in an Urban Election, *J. Urban Aff.*, 28(1), 43–53, doi:10.1111/j.0735-2166.2006.00258.x, 2006.

- Basolo, V., Steinberg, L. J., Burby, R. J., Levine, J., Cruz, A. M. and Huang, C.: The effects of confidence in government and information on perceived and actual preparedness for disasters, *Environ. Behav.*, 41(3), 338–364, 2009.
- Becker, J. S., Paton, D., Johnston, D. M. and Ronan, K. R.: A model of household preparedness for earthquakes: how individuals make meaning of earthquake information and how this influences preparedness, *Nat. Hazards*, 64(1), 107–137, doi:10.1007/s11069-012-0238-x, 2012.
- Bonaiuto, M., Alves, S., De Dominicis, S. and Petruccielli, I.: Place attachment and natural hazard risk: Research review and agenda, *J. Environ. Psychol.*, 48, 33–53, doi:10.1016/j.jenvp.2016.07.007, 2016.
- Bronfman, N. C., Cisternas, P. C., López-Vázquez, E. and Cifuentes, L. A.: Trust and risk perception of natural hazards: implications for risk preparedness in Chile, *Nat. Hazards*, 81(1), 307–327, doi:10.1007/s11069-015-2080-4, 2016.
- 10 Bubeck, P., Botzen, W. J. W. and Aerts, J. C. J. H.: A Review of Risk Perceptions and Other Factors that Influence Flood Mitigation Behavior, *Risk Anal.*, 32(9), 1481–1495, doi:10.1111/j.1539-6924.2011.01783.x, 2012.
- Cui, K., Han, Z. and Wang, D.: Resilience of an Earthquake-Stricken Rural Community in Southwest China: Correlation with Disaster Risk Reduction Efforts, *Int. J. Environ. Res. Public Health*, 15(3), 407, doi:10.3390/ijerph15030407, 2018.
- DeYoung, S. E., Wachtendorf, T., Farmer, A. K. and Penta, S. C.: NOAA Radios and Neighbourhood Networks: Demographic Factors for Channel Preference for Hurricane Evacuation Information, *J. Contingencies Crisis Manag.*, 24(4), 275–285, doi:10.1111/1468-5973.12123, 2016.
- Duval, T. S. and Mulilis, J.-P.: A Person-Relative-to-Event (PrE) Approach to Negative Threat Appeals and Earthquake Preparedness: A Field Study, *J. Appl. Soc. Psychol.*, 29(3), 495–516, doi:10.1111/j.1559-1816.1999.tb01398.x, 1999.
- Ejeta, L. T., Ardalan, A. and Paton, D.: Application of Behavioral Theories to Disaster and Emergency Health Preparedness: A Systematic Review, *PLOS Curr. Disasters*, doi:10.1371/currents.dis.31a8995ced321301466db400f1357829, 2015.
- Eraybar, K., Okazaki, K. and Ilki, A.: An exploratory study on perceptions of seismic risk and mitigation in two districts of Istanbul, *Disasters*, 34(1), 71–92, doi:10.1111/j.1467-7717.2009.01115.x, 2010.
- FEMA: 2015 National Preparedness Goal. [online] Available from: <https://www.fema.gov/media-library/assets/documents/25959> (Accessed 3 July 2017), 2015.
- 25 FEMA: 2016 National Preparedness Report, FEMA. [online] Available from: <https://www.fema.gov/media-library/assets/documents/116951> (Accessed 3 July 2017), 2016.
- Gao, M., Wu, G., Wu, X. and Lang, C.: The Role of the National Significant Seismic Monitoring and Protection Regions Institution: From the Perspective of the Risk- Society Theory, *Earthq. Res. China*, 29(1), 1–7, 2015.
- Godschalk, D. R., Rose, A., Mittler, E., Porter, K. and West, C. T.: Estimating the value of foresight: aggregate analysis of natural hazard mitigation benefits and costs, *J. Environ. Plan. Manag.*, 52(6), 739–756, doi:10.1080/09640560903083715, 2009.
- 30 Han, Z. and Nigg, J.: The influences of business and decision makers' characteristics on disaster preparedness—A study on the 1989 Loma Prieta earthquake, *Int. J. Disaster Risk Sci.*, 2(4), 22–31, doi:10.1007/s13753-011-0017-4, 2011.

- Han, Z., Lu, X., Hörhager, E. I. and Yan, J.: The effects of trust in government on earthquake survivors' risk perception and preparedness in China, *Nat. Hazards*, 86(1), 437–452, doi:10.1007/s11069-016-2699-9, 2017a.
- Han, Z., Wang, H., Du, Q. and Zeng, Y.: Natural Hazards Preparedness in Taiwan: A Comparison Between Households With and Without Disabled Members, *Health Secur.*, 15(6), 575–581, doi:10.1089/hs.2017.0025, 2017b.
- 5 Howe, P. D.: Hurricane preparedness as anticipatory adaptation: A case study of community businesses, *Glob. Environ. Change*, 21(2), 711–720, doi:10.1016/j.gloenvcha.2011.02.001, 2011.
- Kohn, S., Eaton, J. L., Feroz, S., Bainbridge, A. A., Hoolachan, J. and Barnett, D. J.: Personal Disaster Preparedness: An Integrative Review of the Literature, *Disaster Med. Public Health Prep.*, 6(3), 217–231, doi:10.1001/dmp.2012.47, 2012.
- Kung, Y.-W. and Chen, S.-H.: Perception of Earthquake Risk in Taiwan: Effects of Gender and Past Earthquake Experience, *Risk Anal.*, 32(9), 1535–1546, 2012.
- 10 Li, J.-Z., Li, S., Wang, W.-Z., Rao, L.-L. and Liu, H.: Are people always more risk averse after disasters? Surveys after a heavy snow-hit and a major earthquake in China in 2008, *Appl. Cogn. Psychol.*, 25(1), 104–111, doi:10.1002/acp.1648, 2011.
- Lindell, M.: North American Cities at Risk: Household Responses to Environmental Hazards, in *Cities at Risk*, edited by H. Joffe, T. Rossetto, and J. Adams, pp. 109–130, Springer Netherlands., 2013.
- 15 Lindell, M. K. and Perry, R. W.: Household Adjustment to Earthquake Hazard A Review of Research, *Environ. Behav.*, 32(4), 461–501, doi:10.1177/00139160021972621, 2000.
- Lindell, M. K. and Perry, R. W.: The Protective Action Decision Model: Theoretical Modifications and Additional Evidence, *Risk Anal.*, 32(4), 616–632, doi:10.1111/j.1539-6924.2011.01647.x, 2012.
- Lindell, M. K. and Prater, C. S.: Risk Area Residents' Perceptions and Adoption of Seismic Hazard Adjustments, *J. Appl. Soc. Psychol.*, 32(11), 2377–2392, doi:10.1111/j.1559-1816.2002.tb01868.x, 2002.
- 20 Lindell, M. K., Arlikatti, S. and Prater, C. S.: Why People Do What They Do to Protect Against Earthquake Risk: Perceptions of Hazard Adjustment Attributes, *Risk Anal.*, 29(8), 1072–1088, 2009.
- Mishra, S., Mazumdar, S. and Suar, D.: Place attachment and flood preparedness, *J. Environ. Psychol.*, 30(2), 187–197, doi:10.1016/j.jenvp.2009.11.005, 2010.
- 25 Mulilis, J.-P. and Duval, T. S.: The PrE Model of Coping and Tornado Preparedness: Moderating Effects of Responsibility, *J. Appl. Soc. Psychol.*, 27(19), 1750–1766, doi:10.1111/j.1559-1816.1997.tb01623.x, 1997.
- Oral, M., Yenel, A., Oral, E., Aydin, N. and Tuncay, T.: Earthquake experience and preparedness in Turkey, *Disaster Prev. Manag. Int. J.*, 24(1), 21–37, doi:10.1108/DPM-01-2013-0008, 2015.
- Ozdemir, O. and Yilmaz, C.: Factors affecting risk mitigation revisited: the case of earthquake in Turkey, *J. Risk Res.*, 14(PII 30 9267873681), 17–46, 2011.
- Paul, B. K. and Bhuiyan, R. H.: Urban earthquake hazard: perceived seismic risk and preparedness in Dhaka City, Bangladesh, *Disasters*, 34(2), 337–359, doi:10.1111/j.1467-7717.2009.01132.x, 2010.

- Roush, R. E. and Tyson, S. K.: Geriatric Emergency Preparedness and Response Workshops: An Evaluation of Knowledge, Attitudes, Intentions, and Self-Efficacy of Participants, *Disaster Med. Public Health Prep.*, 6(4), 385–392, doi:10.1001/dmp.2012.63, 2012.
- Russell, L. A., Goltz, J. D. and Bourque, L. B.: Preparedness and Hazard Mitigation Actions before and after Two Earthquakes, *Environ. Behav.*, 27(6), 744–770, doi:10.1177/0013916595276002, 1995.
- 5 Sadiq, A.-A. and Graham, J. D.: Exploring the Predictors of Organizational Preparedness for Natural Disasters, *Risk Anal.*, 36(5), 1040–1053, doi:10.1111/risa.12478, 2016.
- Samaddar, S., Chatterjee, R., Misra, B. and Tatano, H.: Outcome-expectancy and self-efficacy: Reasons or results of flood preparedness intention?, *Int. J. Disaster Risk Reduct.*, 8, 91–99, doi:10.1016/j.ijdr.2014.02.002, 2014.
- 10 Soffer, Y., Goldberg, A., Adini, B., Cohen, R., Ben-Ezra, M., Palgi, Y., Essar, N. and Bar-Dayana, Y.: The relationship between demographic/educational parameters and perceptions, knowledge and earthquake mitigation in Israel, *Disasters*, 35(1), 36–44, doi:10.1111/j.1467-7717.2010.01191.x, 2011.
- Spittal, M. J., McClure, J., Siegert, R. J. and Walkey, F. H.: Predictors of Two Types of Earthquake Preparation Survival Activities and Mitigation Activities, *Environ. Behav.*, 40(6), 798–817, 2008.
- 15 State Council of China National Comprehensive Disaster Risk Reduction Plan (2016-2020); 2016 (国务院办公厅 国务院办公厅关于印发国家综合防灾减灾规划 (2016—2020 年) 的通知; 2016). [online] Available from: [http://www.gov.cn/zhengce/content/2017-01/13/content\\_5159459.htm](http://www.gov.cn/zhengce/content/2017-01/13/content_5159459.htm) (Accessed 27 October 2017), 2016.
- Tekeli-Yesil, S., Dedeoglu, N., Braun-Fahrlaender, C. and Tanner, M.: Factors Motivating Individuals to Take Precautionary Action for an Expected Earthquake in Istanbul, *Risk Anal.*, 30(8), 1181–1195, 2010.
- 20 Terpstra, T.: Emotions, Trust, and Perceived Risk: Affective and Cognitive Routes to Flood Preparedness Behavior, *Risk Anal.*, 31(10), 1658–1675, doi:10.1111/j.1539-6924.2011.01616.x, 2011.
- The Earthquake Disaster Risk Reduction Act of the People’s Republic of China; 2008 (中华人民共和国防震减灾法; 2008;). [online] Available from: <http://www.cea.gov.cn/publish/dizhenj/465/527/528/20120216093821109166053/index.html> (Accessed 27 October 2017), 2008.
- 25 Viklund, M. J.: Trust and Risk Perception in Western Europe: A Cross-National Study, *Risk Anal.*, 23(4), 727–738, doi:10.1111/1539-6924.00351, 2003.
- Wachinger, G., Renn, O., Begg, C. and Kuhlicke, C.: The Risk Perception Paradox—Implications for Governance and Communication of Natural Hazards, *Risk Anal.*, 33(6), 1049–1065, doi:10.1111/j.1539-6924.2012.01942.x, 2013.
- Wei, J., Zhu, W., Marinova, D. and Wang, F.: Household adoption of smog protective behavior: a comparison between two Chinese cities, *J. Risk Res.*, 20(7), 846–867, doi:10.1080/13669877.2015.1121904, 2017.
- 30 Zhang, Y., Hwang, S. N. and Lindell, M. K.: Hazard Proximity or Risk Perception? Evaluating Effects of Natural and Technological Hazards on Housing Values, *Environ. Behav.*, 42(5), 597–624, doi:10.1177/0013916509334564, 2010.
- Zhu, D., Xie, X. and Xie, J.: When do people feel more risk? The effect of ambiguity tolerance and message source on purchasing intention of earthquake insurance, *J. Risk Res.*, 15(8), 951–965, 2012.

Figure 1: Historical Earthquakes in Mainland China from 1500.

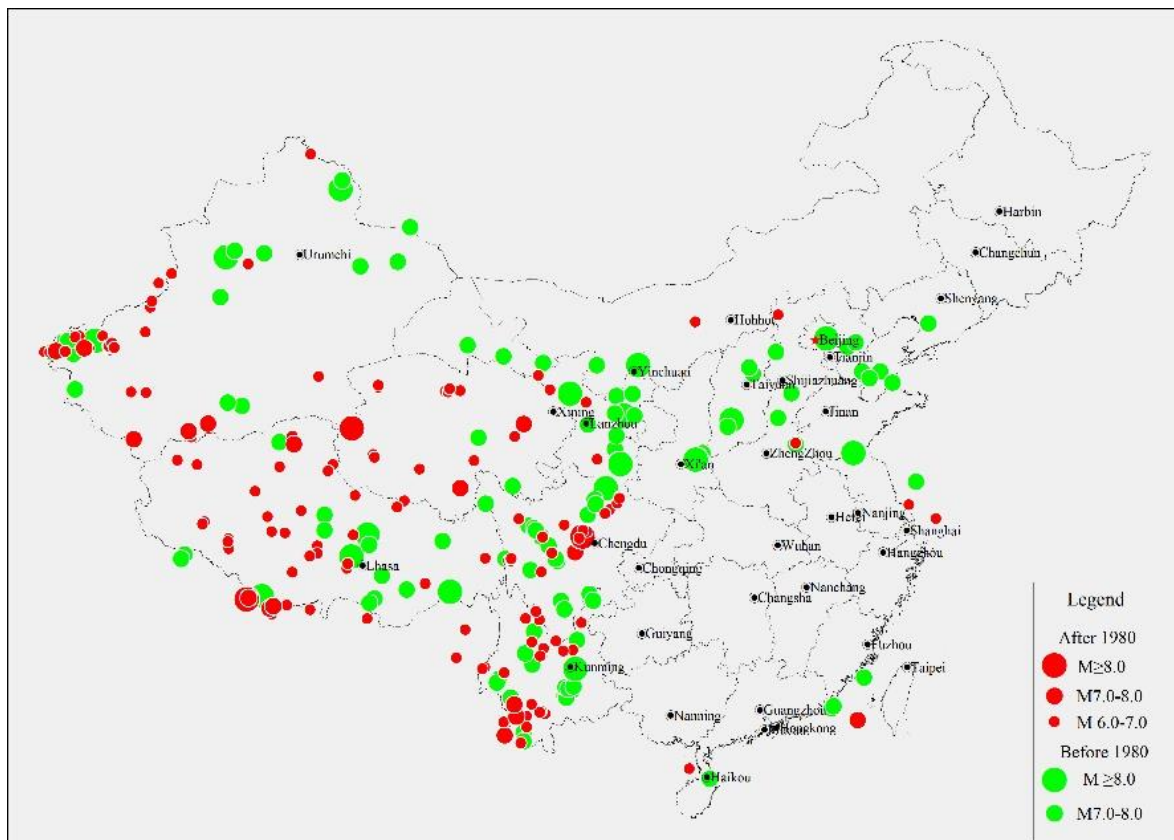



**Figure 3: Mean Value of Material Preparedness.**

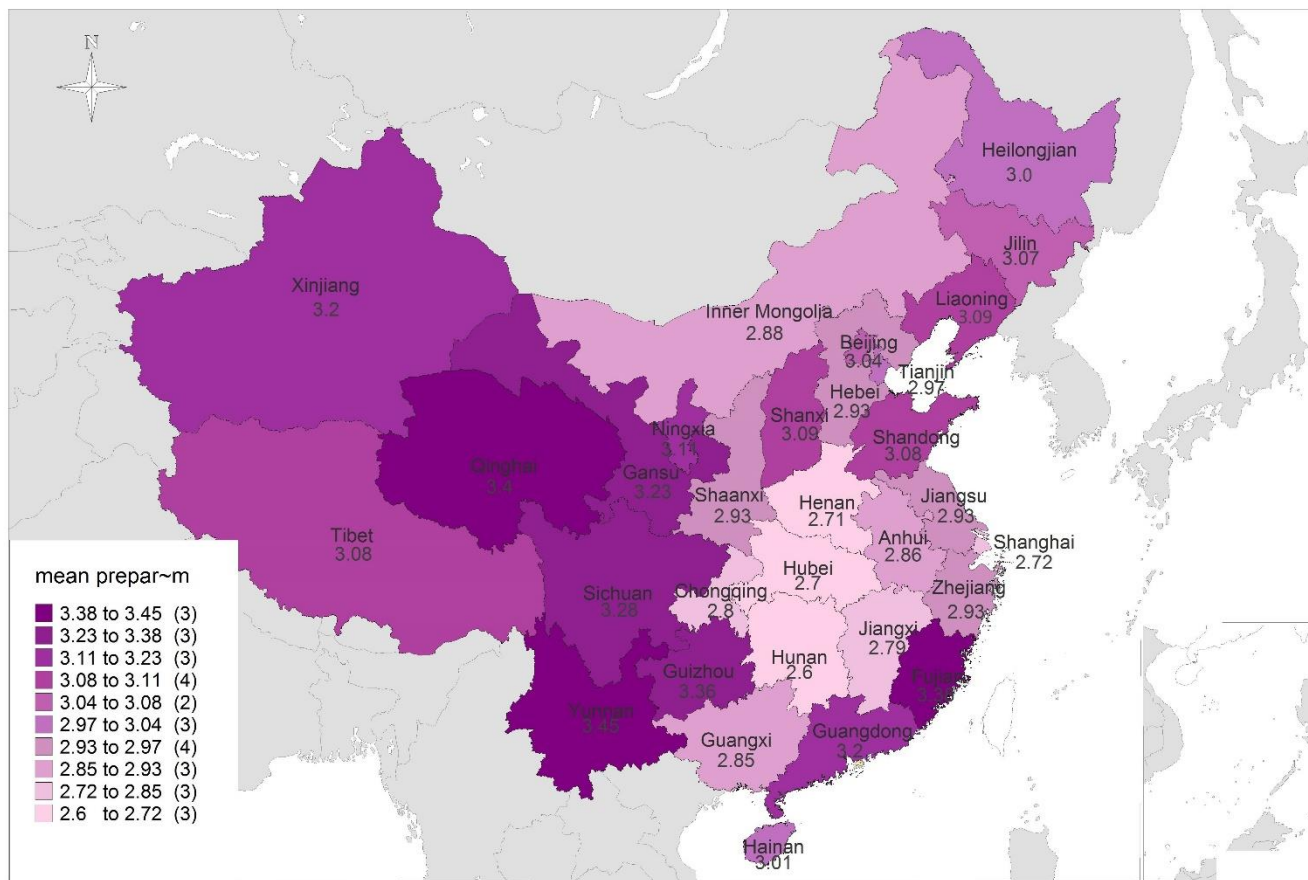

Figure 4: Mean Value of Awareness Preparedness.

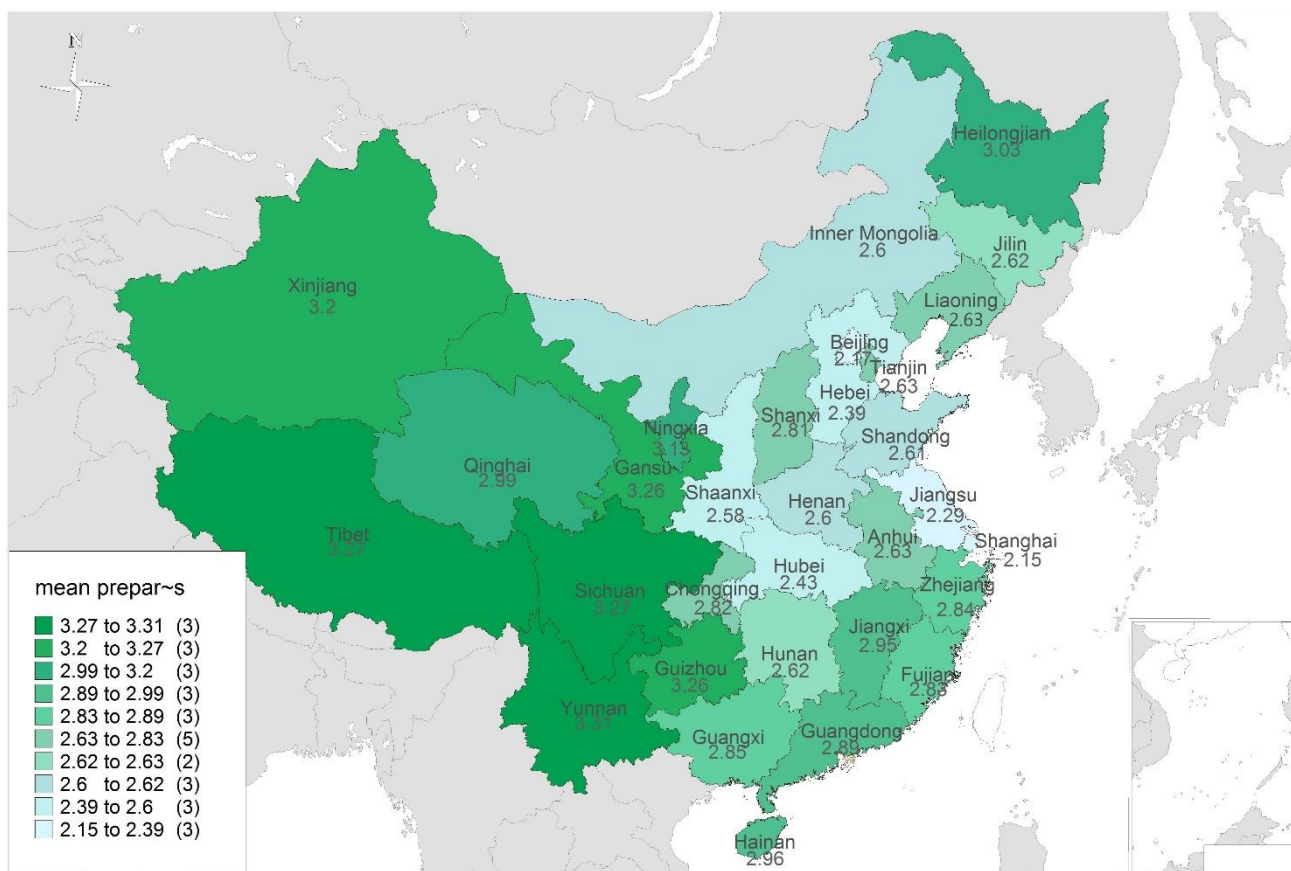

5

10

15



**Table 1.** Comparison of Sample and the National Population

|           |                   | 6 <sup>th</sup> NPCD | Survey result |
|-----------|-------------------|----------------------|---------------|
| Gender    | Male              | 50%                  | 46.4%         |
|           | Female            | 50%                  | 53.6%         |
| Age       | Under 18          | 10%                  | 7%            |
|           | 19-29             | 25%                  | 27.1%         |
|           | 30-39             | 21%                  | 22.1%         |
|           | 40-49             | 15%                  | 14.2%         |
|           | 50-59             | 14%                  | 14.8%         |
|           | Over 60           | 15%                  | 14.9%         |
| Education | College and above | 20%                  | 35.3%         |

**Table 2.** Descriptive Analysis

| Variable                | Mean  | SD    | Min  | Max | Variable                    | Frequency | Percent |
|-------------------------|-------|-------|------|-----|-----------------------------|-----------|---------|
| Prepare Awareness       | 2.79  | 1.54  | 0    | 5   | Education                   | 40        | 1.23    |
| Prepare Material        | 3.02  | 1.57  | 0    | 5   | <i>Primary or lower</i>     |           |         |
| Water                   | 0.74  | 0.44  | 0    | 1   | <i>Middle School</i>        | 545       | 16.80   |
| Food                    | 0.72  | 0.45  | 0    | 1   | <i>High School</i>          | 1,516     | 46.72   |
| Medicine                | 0.65  | 0.48  | 0    | 1   | <i>College</i>              | 1,009     | 31.09   |
| Flash                   | 0.69  | 0.46  | 0    | 1   | <i>Graduate or above</i>    | 135       | 4.16    |
| Radio                   | 0.21  | 0.41  | 0    | 1   | Income Category             | 2,188     | 67.43   |
| Shelter                 | 0.78  | 0.42  | 0    | 1   | <i>&lt;60,000</i>           | 732       | 22.56   |
| Drill                   | 0.62  | 0.49  | 0    | 1   | <i>(60,000-120,000]</i>     | 325       | 10.01   |
| Insurance               | 0.41  | 0.49  | 0    | 1   | <i>&gt;120,000</i>          | 389       | 11.98   |
| Seek Info               | 0.45  | 0.50  | 0    | 1   | Building Type               | 731       | 22.53   |
| Male                    | 0.46  | 0.50  | 0    | 1   | <i>One-storey</i>           | 1,270     | 39.14   |
| Age                     | 38.73 | 15.93 | 15   | 68  | <i>2-3-storey</i>           | 855       | 26.35   |
| Urban                   | 0.61  | 0.49  | 0    | 1   | <i>4-6 storey</i>           |           |         |
| House Age               | 11.50 | 10.85 | 0.20 | 65  | <i>Higher than 7-storey</i> |           |         |
| Vote                    | 0.39  | 0.49  | 0    | 1   | Concern of DRR              | 14        | 0.43    |
| Concern building safety | 0.83  | 0.37  | 0    | 1   | <i>Not at all</i>           | 146       | 4.50    |
|                         |       |       |      |     | <i>Not very concern</i>     | 862       | 26.56   |
|                         |       |       |      |     | <i>Neutral</i>              | 1,514     | 46.66   |
|                         |       |       |      |     | <i>Concern some</i>         | 709       | 21.85   |
|                         |       |       |      |     | <i>Very concern</i>         |           |         |
|                         |       |       |      |     | Total                       | 3,245     | 100     |

**Table 3.** Regression on Material Preparedness and Awareness Ready (N=3,245)

|                            | Awareness Preparedness | Material Preparedness |
|----------------------------|------------------------|-----------------------|
| Male                       | 0.13** (0.05)          | 0.12* (0.05)          |
| Age                        | -0.02*** (0.00)        | -0.00 (0.00)          |
| Education                  | 0.01 (0.04)            | 0.09* (0.04)          |
| Income                     | 0.20*** (0.05)         | 0.05 (0.05)           |
| Urban                      | -0.10 (0.05)           | -0.13* (0.06)         |
| Building type 2-3-storey   | 0.02 (0.08)            | 0.13 (0.10)           |
| 4-6 storey                 | -0.02 (0.08)           | 0.21* (0.09)          |
| Higher than 7-storey       | 0.01 (0.09)            | 0.27* (0.10)          |
| Building Age               | -0.01** (0.00)         | -0.00 (0.00)          |
| Vote                       | 0.63*** (0.05)         | 0.13* (0.06)          |
| Concern of DRR             | 0.65*** (0.03)         | 0.28*** (0.04)        |
| Concern of building safety | 0.62*** (0.06)         | 0.79*** (0.07)        |
| $R^2$                      | 0.332                  | 0.110                 |

Standard errors in parentheses; \*  $p < 0.05$ , \*\*  $p < 0.01$ , \*\*\*  $p < 0.001$ ; the geographical variations were controlled at provincial level but not reported in the table.

5

10

15

**Table 4.** Logistic Regression on Material Preparedness by Type (N=3,245)

|                            | Water          | Food           | Medicine       | Flash          | Radio          |
|----------------------------|----------------|----------------|----------------|----------------|----------------|
| Male                       | 1.00 (0.09)    | 1.13 (0.10)    | 1.10 (0.09)    | 1.03 (0.08)    | 1.53*** (0.14) |
| Age                        | 0.99 (0.00)    | 1.00 (0.00)    | 1.00 (0.00)    | 1.00 (0.00)    | 1.00 (0.00)    |
| Education                  | 1.23** (0.08)  | 1.16* (0.07)   | 1.05 (0.06)    | 1.04 (0.06)    | 1.00 (0.07)    |
| Income                     | 0.90 (0.08)    | 0.99 (0.08)    | 1.18* (0.09)   | 1.10 (0.09)    | 1.15 (0.10)    |
| Urban                      | 0.75** (0.08)  | 0.81* (0.08)   | 0.76** (0.07)  | 0.94 (0.09)    | 1.23 (0.14)    |
| Building type              |                |                |                |                |                |
| 2-3-storey                 | 0.98 (0.15)    | 1.16 (0.17)    | 1.30 (0.18)    | 1.27 (0.18)    | 0.96 (0.16)    |
| 4-6 storey                 | 1.13 (0.17)    | 1.22 (0.18)    | 1.49** (0.20)  | 1.33* (0.18)   | 1.02 (0.17)    |
| Higher than 7-storey       | 1.31 (0.22)    | 1.40* (0.23)   | 1.58** (0.24)  | 1.40* (0.21)   | 0.91 (0.16)    |
| Building Age               | 1.00 (0.00)    | 1.00 (0.00)    | 0.99 (0.00)    | 1.00 (0.00)    | 1.01 (0.00)    |
| Vote                       | 1.09 (0.10)    | 1.14 (0.10)    | 1.37*** (0.12) | 1.05 (0.09)    | 1.12 (0.10)    |
| Concern of DRR             | 1.45*** (0.08) | 1.37*** (0.07) | 1.34*** (0.07) | 1.34*** (0.07) | 1.23*** (0.07) |
| Concern of building safety | 2.50*** (0.27) | 2.16*** (0.23) | 2.22*** (0.23) | 2.15*** (0.22) | 1.57** (0.22)  |
| Pseudo $R^2$               | 0.071          | 0.059          | 0.059          | 0.049          | 0.042          |

Odds Ratios were reported; Standard errors in parentheses; \*  $p < 0.05$ , \*\*  $p < 0.01$ , \*\*\*  $p < 0.001$ ; the geographical variations were controlled at provincial level but not reported in the table.

10

15

**Table 5.** Logistic Regression on Preparedness Awareness (N=3,245)

|                            | Shelter                    | Drill                      | Insurance                  | Predict                    | Seek info                  |
|----------------------------|----------------------------|----------------------------|----------------------------|----------------------------|----------------------------|
| Male                       | 1.32 <sup>**</sup> (0.12)  | 0.87 (0.07)                | 1.13 (0.09)                | 1.32 <sup>***</sup> (0.11) | 1.16 (0.10)                |
| Age                        | 1.00 (0.00)                | 0.96 <sup>***</sup> (0.00) | 0.99 <sup>***</sup> (0.00) | 0.98 <sup>***</sup> (0.00) | 0.99 <sup>***</sup> (0.00) |
| Education                  | 1.00 (0.07)                | 1.16 <sup>*</sup> (0.08)   | 0.95 (0.06)                | 1.04 (0.06)                | 0.91 (0.06)                |
| Income                     | 1.07 (0.10)                | 1.00 (0.08)                | 1.52 <sup>***</sup> (0.12) | 1.13 (0.09)                | 1.42 <sup>***</sup> (0.12) |
| Urban                      | 0.87 (0.09)                | 0.66 <sup>***</sup> (0.07) | 1.02 (0.10)                | 1.03 (0.10)                | 0.97 (0.09)                |
| Building type              |                            |                            |                            |                            |                            |
| 2-3-storey                 | 0.84 (0.14)                | 1.21 (0.19)                | 0.97 (0.14)                | 1.09 (0.15)                | 1.02 (0.15)                |
| 4-6 storey                 | 0.77 (0.12)                | 0.86 (0.13)                | 1.03 (0.15)                | 1.21 (0.17)                | 1.00 (0.14)                |
| Higher than 7-storey       | 0.78 (0.14)                | 0.92 (0.15)                | 0.91 (0.15)                | 1.30 (0.20)                | 1.10 (0.17)                |
| Building Age               | 1.00 (0.00)                | 0.99 <sup>*</sup> (0.00)   | 1.00 (0.00)                | 0.99 (0.00)                | 0.99 <sup>***</sup> (0.00) |
| Vote                       | 1.62 <sup>***</sup> (0.16) | 2.25 <sup>***</sup> (0.20) | 1.67 <sup>***</sup> (0.14) | 1.90 <sup>***</sup> (0.16) | 2.18 <sup>***</sup> (0.18) |
| Concern of DRR             | 1.72 <sup>***</sup> (0.10) | 1.72 <sup>***</sup> (0.10) | 2.27 <sup>***</sup> (0.13) | 2.03 <sup>***</sup> (0.11) | 2.20 <sup>***</sup> (0.13) |
| Concern of building safety | 1.07 (0.12)                | 1.59 <sup>***</sup> (0.18) | 3.99 <sup>***</sup> (0.59) | 1.86 <sup>***</sup> (0.21) | 2.64 <sup>***</sup> (0.34) |
| Pseudo $R^2$               | 0.071                      | 0.180                      | 0.163                      | 0.121                      | 0.170                      |

Odds Ratios were reported; Standard errors in parentheses; \*  $p < 0.05$ , \*\*  $p < 0.01$ , \*\*\*  $p < 0.001$ ; the geographical variations were controlled at provincial level but not reported in the table.
